# Supplementary material
Source: PubMed Central journal article supplement (PMC3992787)
Supplement: ijhpm-2-125-s001.pdf [file ijhpm-2-125-s001.pdf]

## Appendix 1

Two by two tables used in the calculation of odds ratios for reasons for not seeking care by rural residence and the most poor

|                                                                                                 | Sought care |        |        | 95% Confidence Intervals |       |       |                   |
|-------------------------------------------------------------------------------------------------|-------------|--------|--------|--------------------------|-------|-------|-------------------|
|                                                                                                 | Yes         | No     | Total  | Odds Ratio               | Lower | Upper |                   |
| Ill in 2004                                                                                     | 30,363      | 4,767  | 35,130 | 1.12                     | 1.07  | 1.17  | (Significant)     |
| Ill in 1995-6                                                                                   | 31,018      | 5,444  | 36,462 |                          |       |       |                   |
| Total                                                                                           | 61,381      | 10,211 | 71,592 |                          |       |       |                   |
| <b>Mentioned financial reason for not seeking care</b>                                          |             |        |        |                          |       |       |                   |
| <b>Those who did not seek treatment</b>                                                         |             |        |        |                          |       |       |                   |
|                                                                                                 | Yes         | No     | Total  |                          |       |       |                   |
| Rural respondents in 2004                                                                       | 857         | 2,272  | 3,129  | 1.68                     | 1.50  | 1.89  | (Significant)     |
| Rural respondents in 1995-6                                                                     | 657         | 2,931  | 3,588  |                          |       |       |                   |
| Total                                                                                           | 1,514       | 5,203  | 6,717  |                          |       |       |                   |
| <b>Mentioned financial reason for not seeking care</b>                                          |             |        |        |                          |       |       |                   |
| <b>Those who did not seek treatment</b>                                                         |             |        |        |                          |       |       |                   |
|                                                                                                 | Yes         | No     | Total  |                          |       |       |                   |
| Most poor in 2004                                                                               | 475         | 854    | 1,329  | 1.32                     | 1.10  | 1.58  | (Significant)     |
| Most poor in 1995-6                                                                             | 272         | 646    | 918    |                          |       |       |                   |
| Total                                                                                           | 747         | 1,500  | 2,247  |                          |       |       |                   |
| <b>Mentioned lack of medical facility as reason for not seeking care (poor quality of care)</b> |             |        |        |                          |       |       |                   |
| <b>Those who did not seek treatment</b>                                                         |             |        |        |                          |       |       |                   |
|                                                                                                 | Yes         | No     | Total  |                          |       |       | (Not significant) |
| Rural respondents in 2004                                                                       | 410         | 2,719  | 3,129  | 0.99                     | 0.86  | 1.14  |                   |
| Rural respondents in 1995-6                                                                     | 475         | 3,113  | 3,588  |                          |       |       |                   |
| Total                                                                                           |             |        |        |                          |       |       |                   |
| <b>Mentioned lack of medical facility as reason for not seeking care</b>                        |             |        |        |                          |       |       |                   |
|                                                                                                 | Yes         | No     | Total  |                          |       |       |                   |
| Most poor in 2004                                                                               | 122         | 1,207  | 1,329  | 0.70                     | 0.53  | 0.91  | (Significant)     |
| Most poor in 1995-6                                                                             | 116         | 802    | 918    |                          |       |       |                   |
| Total                                                                                           | 122         | 1,207  | 1,329  |                          |       |       |                   |
| <b>Mentioned lack of faith as reason for not seeking care</b>                                   |             |        |        |                          |       |       |                   |

## Appendix 1

Two by two tables used in the calculation of odds ratios for reasons for not seeking care by rural residence and the most poor

|                                                                                | Yes   | No    | Total |      |      |      |                   |
|--------------------------------------------------------------------------------|-------|-------|-------|------|------|------|-------------------|
| Rural respondents in 2004                                                      | 132   | 2,997 | 3,129 | 1.04 | 0.82 | 1.33 | (Not significant) |
| Rural respondents in 1995-6                                                    | 145   | 3,443 | 3,588 |      |      |      |                   |
| Total                                                                          | 277   | 6,440 | 6,717 |      |      |      |                   |
| <b>Mentioned lack of faith as reason for not seeking care</b>                  |       |       |       |      |      |      |                   |
|                                                                                | Yes   | No    | Total |      |      |      |                   |
| Most poor in 2004                                                              | 59    | 1,270 | 1,329 |      |      |      |                   |
| Most poor in 1995-6                                                            | 42    | 876   | 918   | 0.97 | 0.64 | 1.45 | (Not significant) |
| Total                                                                          | 101   | 2,146 | 2,247 |      |      |      |                   |
| <b>Mentioned long waiting as reason for not seeking care</b>                   |       |       |       |      |      |      |                   |
|                                                                                | Yes   | No    | Total |      |      |      |                   |
| Rural respondents in 2004                                                      | 26    | 3,103 | 3,129 |      |      |      |                   |
| Rural respondents in 1995-6                                                    | 17    | 3,571 | 3,588 | 1.76 | 0.95 | 3.25 | (Significant)     |
| Total                                                                          | 43    | 6,674 | 6,717 |      |      |      |                   |
| <b>Mentioned long waiting as reason for not seeking care</b>                   |       |       |       |      |      |      |                   |
|                                                                                | Yes   | No    | Total |      |      |      |                   |
| Most poor in 2004                                                              | 10    | 1,319 | 1,329 |      |      |      |                   |
| Most poor in 1995-6                                                            | 4     | 914   | 918   | 1.73 | 0.54 | 5.54 | (Not significant) |
| Total                                                                          | 14    | 2,233 | 2,247 |      |      |      |                   |
| <b>Mentioned ailment not considered serious as reason for not seeking care</b> |       |       |       |      |      |      |                   |
|                                                                                | Yes   | No    | Total |      |      |      |                   |
| Rural respondents in 2004                                                      | 1,148 | 1,981 | 3,129 |      |      |      |                   |
| Rural respondents in 1995-6                                                    | 1,783 | 1,805 | 3,588 | 0.59 | 0.53 | 0.65 | (Significant)     |
| Total                                                                          | 2,931 | 3,786 | 6,717 |      |      |      |                   |
| <b>Mentioned ailment not considered serious as reason for not seeking care</b> |       |       |       |      |      |      |                   |

## Appendix 1

Two by two tables used in the calculation of odds ratios for reasons for not seeking care by rural residence and the most poor

|                                                        | Yes   | No    | Total |      |      |      |               |
|--------------------------------------------------------|-------|-------|-------|------|------|------|---------------|
| Most poor in 2004                                      | 459   | 870   | 1,329 |      |      |      |               |
| Most poor in 1995-6                                    | 381   | 537   | 918   | 0.74 | 0.62 | 0.88 | (Significant) |
| Total                                                  | 840   | 1,407 | 2,247 |      |      |      |               |
| <b>Mentioned others as reason for not seeking care</b> |       |       |       |      |      |      |               |
|                                                        | Yes   | No    | Total |      |      |      |               |
| Rural respondents in 2004                              | 556   | 2,573 | 3,129 |      |      |      |               |
| Rural respondents in 1995-6                            | 507   | 3,081 | 3,588 | 1.31 | 1.15 | 1.50 | (Significant) |
| Total                                                  | 1,063 | 5,654 | 6,717 |      |      |      |               |
| <b>Mentioned others as reason for not seeking care</b> |       |       |       |      |      |      |               |
|                                                        | Yes   | No    | Total |      |      |      |               |
| Most poor in 2004                                      | 204   | 1,125 | 1,329 |      |      |      |               |
| Most poor in 1995-96                                   | 103   | 815   | 918   | 1.43 | 1.11 | 1.84 | (Significant) |
| Total                                                  | 307   | 1,940 | 2,247 |      |      |      |               |
